# Supplementary material
Source: publisher figshare collection journal article supplement (https://sage.figshare.com/ndownloader/files/13852892)
Supplement: Supplementary file 1 [file 13852892]

**Appendix to “Systematic Review of School Telehealth Evaluations”**

**Appendix 1. Search Strategy by Database**

Initially run from 2006 through 12/31/2016. Updated through 06/30/18

| **Database** | **Search Strategy** |
| --- | --- |
| Academic Search Complete | AB ( (telemedicine or tele-medicine or telecare or tele-care or telehealth or tele-health) ) AND AB ( school or schools ) |
| Cochrane Library | (telemedicine or tele-medicine or telecare or tele-care or telehealth or tele-health) AND (school or schools) in Title, Abstract, Keywords , Publication Year from 2006 to 2018 in Cochrane Reviews |
| ERIC | ( (telemedicine or tele-medicine or telecare or tele-care or telehealth or tele-health) AND (school or schools) ) |
| Grey Literature Report  (discontinued after 2016) | ( (telemedicine) AND (school ) ) |
| Health Policy Reference Center | (telemedicine or tele-medicine or telecare or tele-care or telehealth or tele-health) AND (school or schools) |
| LISTA | ( (telemedicine or tele-medicine or telecare or tele-care or telehealth or tele-health) AND (school or schools) ) |
| PubMed | (("telemedicine"[MeSH Terms] OR "telemedicine" [Title/Abstract]) OR tele-medicine [Title/Abstract] OR telecare [Title/Abstract] OR tele-care [Title/Abstract] OR ("telemedicine"[MeSH Terms] OR "telemedicine" [Title/Abstract] OR "telehealth" [Title/Abstract]) OR tele-health [Title/Abstract]) AND (("schools"[MeSH Terms] OR "schools" [Title/Abstract] OR "school"[Title/Abstract]) OR ("schools"[MeSH Terms] OR "schools" [Title/Abstract])) AND (("2006/01/01"[PDAT] : "2018/06/30"[PDAT]) AND English[lang]) |
| SCOPUS | TITLE-ABS-KEY ( ( telemedicine  OR  tele-medicine  OR  telecare  OR  tele-care  OR  telehealth  OR  tele-health )  AND  ( school  OR  schools ) )  AND  ( LIMIT-TO ( LANGUAGE ,  "English" ) )  AND LIMIT-TO ( PUBYEAR ,  2018 )  OR LIMIT-TO ( PUBYEAR ,  2017 )  OR  LIMIT-TO ( LIMIT-TO ( PUBYEAR ,  2016 )  OR  LIMIT-TO ( PUBYEAR ,  2015 )  OR  LIMIT-TO ( PUBYEAR ,  2014 )  OR  LIMIT-TO ( PUBYEAR ,  2013 )  OR  LIMIT-TO ( PUBYEAR ,  2012 )  OR  LIMIT-TO ( PUBYEAR ,  2011 )  OR  LIMIT-TO ( PUBYEAR ,  2010 )  OR  LIMIT-TO ( PUBYEAR ,  2009 )  OR  LIMIT-TO ( PUBYEAR ,  2008 )  OR  LIMIT-TO ( PUBYEAR ,  2007 )  OR  LIMIT-TO ( PUBYEAR ,  2006 ) ) |
